# Supplementary material for: Spelling Errors in Brief Computer-Mediated Texts Implicitly Lead to Linearly Additive Penalties in Trustworthiness
Source: Frontiers journal article supplement (doi:10.3389/fpsyg.2022.873844), 2022-05-06
Supplement: Data_Sheet_2.xls [file Data_Sheet_2.xls]

## Sheet: Sheet1
Excerpt #	Paragraph Name	Correct Word	Misspelling	URL 1 where misspelling is found	Text from URL 1	URL 2 where misspelling is found	Text from URL 2
P01	Vit D	that	tht	https://www.netmums.com/coffeehouse/drop-clinic-984/maternal-mental-health-995/454366-feeling-so-lost-myself-19.html	Apart from printing this off some how i have to learn to speak out how i feel, but how do i do tht?? ive never done tht ive kept it all locked up hidden away for yrs and yrs, darent open it up, darent ask for help sometimes dont want to feel like im a burnden on anyone.	https://www.mentalhealthforum.net/forum/threads/do-you-ever-feel.21991/	Are you anxious about much? as I find it's worst when I have a head full of worry, it's the dealing with all the internal stuff tht makes it feel like any eternal pressure may make me snap.
P01	Vit D	countries	contrys	https://forum.madeformums.com/baby/75356-any-opinions-on-vaccines.html	hi my 4 y/o daughter had all her jabs ( including the mmr) and so will my 4 m/o son. i feel very strongly about getting my children vaccinated coz when i was a baby the day before i had my measles jab i came down with measles and it has permantly dammaged my hearing and i was hospaltised coz i could have died. so im sorry but who ever said that deases dont kill or cause any side affects i hate to…	https://forwomenseyesonly.com/2013/02/14/women-boycotting-unnecessary-pelvic-exams-by-buying-birth-control-pills-online/	I currently live in the US, but I might move soon (for various reasons- actually, this is one of them). I heard pretty much what I wrote (it might be a vote or something in a couple of months or something- it wasn’t real conclusive). If the Americans do it, though- it seems the rest of the “America-esque” countries will do it, too. I think in Canada it’s supposed to just be a questionaire (maybe,…
P01	Vit D	decrease	decrese	https://patient.info/forums/discuss/hydrocele-problem-455549	i want to know about what will defect in future if i doesn,t advice to any doctor and no surgury please reply me because my left side testicle is too large them right side and it is from before 4 monts . what defect it can create on my body now it iesnt pain only it decrese my sexual tendency...please give my advice...	https://podiatryarena.com/index.php?threads/sudden-onset-supinated-foot-post-ankle-fusion-on-other-leg.25146/	More likley the surgery is a red herring and she has an upper motor nneuron lesion causing an increasein tone in the invertor musclature. This would account for an apparnet decrese in subtalar ROM secondary to the hypertonicity rather than and "actual" reduction in subtalar joint ROM.
P01	Vit D	deficiency	defficiency	http://www.city-data.com/forum/health-wellness/861632-ibs-daily-imodium-question-2.html	Are you sure you have IBS? My Uncle thought he did, found out it was a vitamin K defficiency.	https://www.vitamindcouncil.org/forums/topic/hello-i-have-been-vitamiin-d-defficient-for-a-long-time-my-current-levels-are-18ng-ml-i-would-like-to-know-if-such-a-defficiency-could-have-an-impact-on-the-pelvic-floor-muscles-being-very-week-i/	Hello, I have been vitamiin D defficient for a long time, my current levels are 18ng/ml. I would like to know if such a defficiency could have an impact on the pelvic floor muscles being very week. I am 38 years old without children and i know for sure that when my levels were at 12 ng/ml about two years ago I had severe muscle weakness on my legs, that’s why i have ro wonder about the pelvic flo…
P01	Vit D	level	levell	https://www.mentalhealthforum.net/forum/threads/25-ml-daily-present-few-side-affects-reducing.162849/page-7#post-1826572	I am hoping to levell off, either Monday or Tuesday this week, also, neighbours have been having a lunchtime family invites and bbq round, so extra voices, means extra problems for me. on 20ml.	https://www.mentalhealthforum.net/forum/threads/do-your-meds-stop-the-voices.103050/page-3	I am still very well, since my recent further bout of sinsinusituses over took me, and triggered off my mental health ailments on the szchophrenia area of things pretty badly, I had the complete works of anxiety, paranoia, and hearing voices all over the one weekend. I suddenly relaised, that I reduced my doseage down slightly from the Monday, of the previous, thinking I was very well, so I felt …
P02	Trigger	completely	cmpletely	https://www.mentalhealthforum.net/forum/threads/too-much-ad.17725/	I even started drawing all over the white board in the docs room and playing the piano there I cant even remember him talking to my husband, he then told me to just stop cmpletely taking the sertraline and prescribed olanzipan (or however it's spelt) which i havent taken yet, I still want to take the sertralin and think he was just basing everything on that one day	https://www.mentalhealthforum.net/forum/threads/how-to-get-rid-of-voices-completely-and-be-master-and-commander-of-your-life-again.9948/	Could you please point out to me the bit at tells one how to get rid of voices cmpletely, and become master and commander of one's life again? I seem to have missed that bit,
P02	Trigger	exposure	expsure	https://boards.cruisecritic.co.uk/topic/2331073-crew-member-with-hepatitis-a/	As far as Crystal goes, I believe just like with Norovirus, they have a requirement to notify people that there is a possibility for them to have expsure. I think it's a public health requirement.	http://www.hookahforum.com/topic/10446-hookah-and-birth-control/	Seriously, it's the nicotine that raises blood pressure and if you are on the pill any expsure to nicotine is probably not going to be good for you. My wife is on BC, and occasionally takes a puff or two on the hookah to try the flavor, but I would discourage you or anyone on the pill from smoking regularly.
P02	Trigger	instance	insttance	https://www.thecoli.com/threads/the-mental-health-thread.147493/page-30	I feel the same about social media in general. People wanna show an image of always having the best time of their lives regardless of their actual circumstances. For insttance I know a lot of couples who post a bunch of lovely messages one day and break up the next.	http://zorinerinaldi.com/gallery/index.php?album=&image=zen-logo.jpg&popup=1	І ɦad bееn wondering іf оur hosting іѕ ΟK?Not tһɑt І amm complaining, Ьut sluggish loading insttances times ᴡill νery frequently aaffect
P02	Trigger	toxic	toxxic	https://www.petforums.co.uk/threads/cat-taking-paracetamol.215116/	My sisters cat ingested two extra strength paracetamol about 1 week and a half ago, without any of us knowing, shes got no sense of smell and weak taste buds ( birth defect) so she at mine for three weeks following being spayed as my sister was working too much to properly look after her, then about 2 days before going home, she was vomitting and dead lethargic, we had no idea why,. but she seeme…	https://www.hedgehogcentral.com/forums/11-health/74298-neosporin-pain-relief.html	Hanlet has peeling feet and i was considerin putting neosporin on them for him but we only hae the plus pain relief kind and i wasnt sure if it was toxxic them like the extra strength kind is.
P02	Trigger	constantly	connstantly	https://www.mentalhealthforum.net/forum/threads/dying-for-some-insight-advice-please-its-getting-me-so-down.15590/	my 2nd had a slightly bigger one and i didnt notice but 1 morning i did and i couldnt think about anythign else it literally became a focus point for some odd reason and it made me feel weirdly bad just having it connstantly in my head, clearly some OCD and my last partner was beautiful and again had a small bump	https://forums.runnersworld.co.uk/discussion/88740/why-do-i-have-bad-soleus-calf	Is the soleus problem a kind of repetitive injury? Connstant pace with not much variation. Training for football for 90mins to 2 hours no probs, running 2 miles 15 mins can feel the soleus start to "go".
P03	EBV	question	qustion	https://forum.thaivisa.com/topic/64900-nerve-block/	Hi all I am new to this forum so a little help would be needed, Would anyone know where I can get a nerve block done in bangkok, the area in qustion is in my heel. The Western doctors I have seen can not find anything wrong with me so I feel this is my last serious option.	https://community.macmillan.org.uk/cancer_types/breast-cancer/f/breast-cancer-forum/124362/qustion-re-high-grade-dcis	Qustion re High Grade DCIS
P03	EBV	hereditary	heraditary	https://www.sheffieldforum.co.uk/topic/272193-help-with-psoriasis/page/3/#comments	they say its not heraditary but i have a small patch of red spots on my leg that will not go,they dry out and get very itchy and crack ..i said in earlier post my mother has it severley so im a bit scared to go to the docs i have been self medicating.with various creams and potions.my hubby says it could be dermatitus or something..maybe i will go to docs and get it sorted.xxx	https://www.netmums.com/coffeehouse/drop-clinic-984/baby-child-health-989/158201-anyone-elses-child-have-funnel-chest.html	oh im glad its improved, im just really worried because of the op my OH had to have and he's says he wouldn't wish it on anyone (he had to have most of his ribs broken and then all wired back into place:shock:) ...... i've always thought my LO had it because his dad has iykiwm? like a heraditary thing?
P03	EBV	proper	propper	https://www.mentalhealthforum.net/forum/threads/finally-got-an-apointment.79944/	Yey just got off the fone with single point of acess team, i got through at last, they are sending me to get a propper assesement im well pleased, that means i should get to go home soon	https://www.mentalhealthforum.net/forum/threads/anyone-from-ireland.105635/	Maybe try different meds, but lexapro have been know to cause anxiety thats why some people use xanax while taking them to chill them out, but they are quite addictive. Have you actually been refferd to a sycologist by your gp to get a propper diagnosis they will spend time with you, thats what I am doing.And yes triggers are the main problem for me aswell, first thing in the morning!!!! But beha…
P03	EBV	contact	cntact	https://forum.madeformums.com/baby/76282-how-long-for-an-episiotomy-to-heal.html	how long ago did you have it? if you have any concerns go and see your gp or cntact midwives for reassurance. i have plenty of tips but need to know what stage you are at.	https://www.mentalhealthforum.net/forum/threads/need-help-in-coming-out-of-this-situation-emotionally-stuck.60588/	i felt disgusted and i was so upset that day..and my close friend(female) advised me to end my cntact with co worker..since she said i crossed my line..and betrayed my husband.
P03	EBV	vitamin	vittamin	https://www.socialanxietysupport.com/forum/f11/vittamin-b12-experience-118929/	Vittamin B12 experience At the beginning of this year 2011 I had bought a new brand of vitamin B12 that came in a spray bottle. I've taken a supplement for this ever since I became vegan 3 years ago. (And it should be noted that I was vegetarian for 17 years prior to becoming vegan during which I did not take B12 supplements) Anyway, I had heard that there is really no danger in taking high amoun…	https://healthunlocked.com/thyroiduk/posts/136345207/very-low-vitamin-d-.but-i-have-ceral-every-day-vitam-d	Hi my doctor give me. 20.000 vittamin d. And she said my b vittamins. Were ok .but she give me folic acid 5mg.but been told this is vitaminb. And bloods come underactive thyroid
P04	Small Risk	small	smalll	https://www.thestudentroom.co.uk/showthread.php?t=5670272	Should I be worried I go an onion out of my cupboard and cut it open then realised it was soft i swallowed it and realised half the onion was soft I consumed a smalll amount should I be worried	https://www.mentalhealthforum.net/forum/threads/how-many-people-know-about-your-mh-problems.33273/	my dads side of the family know.... my friends know and my collegues know i do regreat all my collegues knowing but unfortunatly when u work somewhere smalll they realise sumat isnt quite rite dont they
P04	Small Risk	people	peeple	https://www.mentalhealthforum.net/forum/threads/losing-control.23591/	Vent away, I can understand you not wanting to go for the Easter dinner, if it is going to cause you so much anxiety then just don;t go. Peeple assume we can just pull ourselves together, but I know as well as you its not that simple.	https://www.thestudentroom.co.uk/showthread.php?t=4693556	I am confused as to what peeple i liek. mabee som1 cud helpme
P04	Small Risk	system	systemm	https://www.mentalhealthforum.net/forum/threads/is-it-possible-to-be-permanently-psychotic.21120/	I have been assigned extra help becuase they have decided that i have been psychotic since being in the systemm (about a year) I dont get this at all. Isnt it something that comes and goes or are they just all talking out there arses?	https://patient.info/forums/discuss/pain-killers--493343	i took Sulphalazine for 8 months but was taken off rhem because i had a chest infectionthat seemed to last it never went away i think this lowerd your immune systemm i am now on prednisolone
P04	Small Risk	level	levell	https://www.mentalhealthforum.net/forum/threads/25-ml-daily-present-few-side-affects-reducing.162849/page-7#post-1826572	I am hoping to levell off, either Monday or Tuesday this week, also, neighbours have been having a lunchtime family invites and bbq round, so extra voices, means extra problems for me. on 20ml.	https://www.mentalhealthforum.net/forum/threads/do-your-meds-stop-the-voices.103050/page-3	I am still very well, since my recent further bout of sinsinusituses over took me, and triggered off my mental health ailments on the szchophrenia area of things pretty badly, I had the complete works of anxiety, paranoia, and hearing voices all over the one weekend. I suddenly relaised, that I reduced my doseage down slightly from the Monday, of the previous, thinking I was very well, so I felt …
P04	Small Risk	concerns	concernss	https://tripawds.com/forums/treatment-and-recovery/new-member-when-do-i-stop-bandaging/	And we are all nere to help support you with any concernss you may have! Goodness knows this journey is full of ups and downs during recovery! We certainly understand like no others can!	https://www.healthcaremagic.com/questions/Child-has-fever-with-yellow-discharge-from-right-eye-has-headaches-leg-aches-Given-Acimetophen-What-else/431730	i can feel your concernss
P05	Up there	there	theere	https://www.menopausematters.co.uk/forum/index.php?topic=30970.0	I've been theere too. The absolute worst thing you can do is google. Your'e looking for reassurance and only the worst case scenarios are on google, never the normal ones!!	https://patient.info/forums/discuss/living-with-allergies-is-causing-depression-health-issues-542597	Sorry just came across your message. Just getting some details about allergy testing for someone when I saw your message. ​Theere are various allergy testng centres in London and elsewhere. Many are NHS ones. They sound really thorough.
P05	Up there	which	wich	https://www.mentalhealthforum.net/forum/threads/driving-and-visual-hallucinations.197961/	But yesterday, I was driving home and I saw a very bright light from one of the rear view mirrors. It was blinding and I lost control of the car for a second. Then I cheked and it was only a traffic light. Also, sometimes I see my own reflection from one of the rear view mirrors, wich is completely impossible.	https://get-help.stopitnow.org.uk/family-and-friends/family-and-friends-forum/topic/492	Social serices are coming next week. I habe a 12 yo and a 3yo they were both at home when the arrest was made and the warrant executed. I just feel that i want to protect them from the media and oublic storm. Especially my eldest he is at a vulnerable age as it is and has a severe anxiety disorder wich he is under mental health for. I just think that it being published and the stigma is going to …
P05	Up there	estimate	esstimate	https://community.diabetes.org/discuss/viewtopic/3/13270?post_id=140192	This board was a lifesaver for me when I was diagnosed. The info is here for those who seek it. (I esstimate it to be less then 10% of diabetics out there, probably way less) At my work around 30% of workers are diabetics (native land very high rate of type 2) they are interested in my relatively good numbers	https://www.bluelight.org/xf/threads/best-rc-to-have-great-sex-on.740342/	I cannot in good concious encourage this type of combo for HR, even if you're extremely experienced,:\ however if you are and find yourself in a perfect set and setting, and manage to esstimate what dosages and in what order to take, why not try, maybe preferably ith a 4-HO-MET or DET instead of 2C-E, i think it's safer interaction
P05	Up there	you	yu	https://www.mentalhealthforum.net/forum/threads/some-good-news-to-share-at-last.18635/	First of all i wanna wish yu all the very best for crimbo and new year. Been to PDoc this morning 4 my appointment, she said olanzapine has stablised mi and i can look to going bk to work yipeeeeeeeeeeeeeee. I may ave my licence took off mi for 3 months tho coz she said yu gotta be stable on meds for 3 months, but i can always change my shift patterns at work so i can use public transport. I've g…	https://www.mentalhealthforum.net/forum/threads/the-i-who-madness-of-the-voices.145896/	i tried to pinch another part of my body to forget about the feeling in my feet and laid down in bed is awkward got rid of them after an hour felt like forever tried to put my mind on my to do list tommorrow but yu know what it is difficult to fall out with them when they are in your mind they just turn up uninvited
P05	Up there	medicine	meddicine	https://ehealthforum.com/health/topic17186.html	Yeah, ice, heat and all that crap will not help. You need anti inflamatory meddicine followed by allupurionol. I take 100 ml of allupurionol a day and I havent had an attack.	https://www.epilepsy.com/connect/forums/new-epilepsycom/tb-skin-test-and-epilepsy	Hi, I have had epilepsy all just about all my life. Too make a long story short. I had to get a TB test in October, cause I got a job at the local school. Well after a few days I started haveing drop seizures. My neurologist said the TB test shouldn't have mattered. It was just the fact that we were trying to get the right dose of meddicine in me. Plus I was on new meddicen.
P06	Avonex	beware	bewere	https://forums.careplace.com/t/general-qus-about-di-pls-help/2282	7.upping the dosage is normal. at 21 I was taking to squirts in the am and 2 at night. Then the meds started wearing off around 2:30 pm. So now i have been given the needle injections which I hate!!! But bewere of this. It does not work as fast as the nasal spray. You can not drink as much water right after you took the shot. it is a great risk for a sezier.	http://www.rubywax.net/blog/pain-is-pain-but-suffering-is-optional?view=full	Thus bewere of scammers because most persons are been scammed and they ended up getting all solutions to their cyber bullies and attacks by US.
P06	Avonex	patient	paytient	http://kidneypatientguide.org.uk/forum/viewtopic.php?f=2&t=4394	As xxxx has said you don't feel any pain, just a bit of weird sensation and slight pressure on your wrist (if that is where they are doing it), if you have a local aneasthetic, sometimes called an "arm block", where the whole arm is deadened. I understand that some fistula's are done under a general, but I think that it depends on your surgeon. I have to admit that is a very long time ago that I …	J:boards.medscape.com/forums/.29f99c4b%3F50%40479.k5V5dLY4wU0%40+&cd=1&hl=en&ct=clnk&gl=uk	We are told how expensive hospital and doctor care is. We are not told how much our Medicare leadership pays out. For example, a recent ]Medicare payment to a Boston Hospital for $73.00: two vital tests, paid $2.99 to the hospital, and, asked the paytient to pay a $5.00 Copay.
P06	Avonex	immune	immmune	http://w.healthlinkusa.com/hlu_84906_1_sarcoidosis-aspx	Have had this disease since I was 28. How does this disease progress with age. It settled in my joints. Chronic pain. Lowered immmune system.I have good and bad days.	https://www.mentalhealthforum.net/forum/threads/commonly-prescribed-psychiatric-drugs-do-they-work.131391/	I couldn't live withoiut it apart from the fact whether if I have become to immmune, with it having been around 9 years now.
P06	Avonex	immune	immmune	http://w.healthlinkusa.com/hlu_84906_1_sarcoidosis-aspx	Have had this disease since I was 28. How does this disease progress with age. It settled in my joints. Chronic pain. Lowered immmune system.I have good and bad days.	https://www.mentalhealthforum.net/forum/threads/commonly-prescribed-psychiatric-drugs-do-they-work.131391/	I couldn't live withoiut it apart from the fact whether if I have become to immmune, with it having been around 9 years now.
P06	Avonex	monitoring	monnitoring	https://www.mumsnet.com/Talk/general_health/1489051-Worried-about-ds-taking-Azathioprine-for-Ulcerative-Colitis-any-experiences-or-advice-please	Hi, saw this and thought I would let you know my DH's experience of both asacol and azathioprine. He has UC and was diagnosed as a teenager, her has been taking both for around 14 years and they have greatly improved his quality of life. In the time we have been together he has only had 2-3 bad flare ups which have required steriod treatment (usually several weeks) but his consultant has advised …	https://www.mumsnet.com/Talk/general_health/1489051-Worried-about-ds-taking-Azathioprine-for-Ulcerative-Colitis-any-experiences-or-advice-please	He has very regular monnitoring and is under the care of a very good consultant. What area are you in? You may be able to request a referral.
P07	Programmer	positive	pisitive	https://www.mentalhealthforum.net/forum/threads/should-i-hate-them-or-forget-everything.117157/	Cinders - with medication now i feel so good. Thanks for your information. Within my country it is difficult to expecting any kind of financial support. I hope to get my first job in next month. I know that pisitive feelings can loss again. But i try to fight for happiness. Life is not easy. But why i expect easy life. Hard life gives more joy than easy life. We all can defeat the bipolar monster…	https://forum.diabetes.org.uk/boards/threads/hi-newbie-here.57618/	Hi Al and welcome to forum. Great to make pisitive changes. Well done
P07	Programmer	steel	steeel	https://forums.whirlpool.net.au/archive/34zr7p73-3	Well the humidifier tub on my resmed s9 is pitted and looks like it will soon be swiss cheese :) Yes, like mine it must be aluminium bottomed! In an earier posting someone tried to tell me they were all stainless steel. Are stainless steeel bottomed Resmed tubs even availible?	https://forums.whirlpool.net.au/archive/34zr7p73-3	In an earier posting someone tried to tell me they were all stainless steel. Are stainless steeel bottomed Resmed tubs even availible?
P07	Programmer	considered	cnsidered	https://forum.thaivisa.com/topic/11826-athletes-foot/	You can use any anti fungal as Lamisil ( or any anti mycotic, mycostatin etc) daily. 1. Wash your feet in the morning with Nystatin Shampoo( this is an antifungal) and then apply Lamisil.this is somewhat conventional treatment Below is an alternative which works. BELOW are alternatives. which work. 2.Before you go to bed wash with Nystatin Shampoo and then dip toes in 70% alcohol, ( will sting)Bl…	http://www.safetynewsalert.com/employee-wins-100k-over-allergy-to-co-workers-perfume/	Management should not be “afraid” to pull an employee aside and tell them about their personal Hygiene if it is bothersome to more than one employee. This is getting off the topic of safety though. What is the safety issue? The issue is someone’s reaction to a particular scent. Can this be cnsidered a safety issue? Obviously this one was.
P07	Programmer	triple	tripple	https://forum.breastcancercare.org.uk/t5/Public-Archive/Tripple-negative/td-p/999536	Thank u for your reply!! I'm enquiring for my sister who had a tripple neg tumour, 2 sentinel nodes removedm, both clear, mastectomy and has had chemo!! have been feeling worried wondering if she needs a scan or anything else! Xx	https://www.mentalhealthforum.net/forum/threads/the-sh-t-tip-which-is-my-life.33121/	I just spend the moeny I had yesterday and today I'm back to being skint @ least I've got Tanya's crimbo gift (no much this year) I hate feeling so low with it all, life money double and women tripple
P07	Programmer	barely	baarely	https://patient.info/forums/discuss/are-my-symptoms-those-of-ms--564091	Hey so i had similar symptoms to you and im 20 years old only i didn't collapse i just slowly got so weak i could baarely walk or move and i had the numbness and tingling. I sort of pushed to get the MRI at the beginning as my mum has MS and i sorta regret it because i had it done and had to pay $550 and then ended up in hospital like a week or so later and had the same thing done for free haha s…	https://www.mumsnet.com/Talk/general_health/177642-what-s-the-f-ing-point-and-where-s-the	well, over w/e had gone on tea frenzy, so today started back on straight and narrow with no tea & no sugar and feel 100 times worse. also had late night (11.30) so eyes on stalks & baarely alive today. will believe you that it will get better. can't believe it taked so many weeks
P08	Half	cognitive	cognitiv	https://community.scope.org.uk/discussion/38827/i-have-severe-agoraphobia	Hello Tamatha..I suffer from agoraphobia too,it is so disabling. Many years ago,l had cognitve behaviour therapy for it,but it was unsuccessful sadly.Do try anything that is suggested on here though,to give you the best chance of overcoming it.I wish you luck.	https://www.mentalhealthforum.net/forum/threads/simulated-situation-psychosis-trigger-and-resolve.36298/	Although I think medication is good for a crisis situation, to me (and others) the real solution is to help the person upgrade their base "operating system" like Windows or any other OS is updated or upgraded -- in a series of patches and upgrades until the person is able to navigate the above situation better. In real terms, this would mean therapy combining Dialectic and Cognitve Behavioral The…
P08	Half	approximately	apprroximately	https://www.curezone.org/forums/am.asp?i=126738	I had typhoid fever (twice in my life, as a child and the last time was 16 years ago). The second time I had it I did pass about one dozen of calcified green stones apprroximately about 5/16" triangular shapped (kind like fenugreek seeds shape) during the period of diarrhea cuased by the fever. I never took anything to induced this stones to come out. I did not know I had stones in my liver/gallb…	https://www.flytalk.co.za/forum/showthread.php/4020-Beer/page13	My Dad got hold of a few kg's of a very good ale yeast, and brewed up 200 litres last week. That gives me apprroximately 3 - 4 weeks to finish my pub for a wetting!
P08	Half	necessary	nescessary	http://www.captaincynic.com/thread/16705/medication-for-depression.htm	If its a question of suicidal downs, then medication is good, but aside from that, I think its work, will and possibly some psychological (drug-free) therapy that is nescessary.	https://thinksteroids.com/community/threads/i-am-on-hrt-with-dim.134234451/	By itself, DIM is not absorbed adequately, so, an artificial system has to be created to make it bioavailable. This isnt nescessary when DIM is converted naturally from I3C.
P08	Half	perceive	percive	https://www.mentalhealthforum.net/forum/threads/thinking-about-it-this-is-good.20581/	ok i probably repeated myself alot and made little sense there, but this is a GOOD thing really if i can keep going with this state of mind even for a little while things could improve alot....lifes been kind of at a standstill recentley.....i dont know how im going to change that yet (im thinking very honestly and literally....pherhaps over analyzing everything but that cant be that bad surley) …	https://forums.au.reachout.com/t5/Getting-Real-sessions/Positive-bodies-avoiding-thinspo-and-bigorexia/m-p/19082/highlight/true	Body image is how we percive our body, and whether we like it or not. A positive body image is where we like the way our body is and we accept it for what it is, and negative body image is where we dislike our body and don't necessarily accept how it is.
P08	Half	calculations	calculitons	https://forums.imore.com/health-fitness-corner/252686-eating-healthy-weight-loss-2.html	On the other hand I can use a bakery sub roll with two servings of ham and turkey each and cheese with spinach and light mayo and its around 12 points and more filling than the subway sub and about equal to chic fillet. Are there any better options for subs besides subway? (Sorry if points confuse you. They basically are, the calculated based on fat, calories and fiber, at least at the time I did…	https://community.myfitnesspal.com/en/discussion/733421/my-friend-is-on-a-1000-calorie-diet	Weight loss is simple, calories in calories out while watching your macros and other percentages. Firstly, you would need to figure out your BMR and TDEE to even know where you should be eating (fit-fatradio.com has all these calculatons for you).
P09	Exercises	despair	despear	https://www.mentalhealthforum.net/forum/threads/borderline-personility-disorder-has-ruined-my-life.38357/	I am not sure if any one has ever felt like bpd has ruined there life and left them wondering who they are and what they feel. It drives me mad going from happy to sucicdeal in a matter of minutes sometimes with no obvious reason. The constant felling of lonyness and wanting approval from everybody you meet some may be just the avarage person you bump into in a coffe shop you mind starts wonderin…	https://healthunlocked.com/rlsuk/posts/139871201/something-to-be-aware-of-when-taking-gapbapentin-or-pregabalin.	I respect everyone’s choice of treatment, I am just alarmed to hear about them. I am new into this forum and I wasn’t expecting to read about that kind of medication. That brings even more fright and despear to me.
P09	Exercises	experience	exprience	https://www.mentalhealthforum.net/forum/tags/exprience/	hiya folks does anyone have exprience of this drug? top pysch say me must take what is it and who does it do? clonazepam is it realy what one could take or leave, kind thoughts and ideas much appreciated. Tecno	https://www.thestudentroom.co.uk/showthread.php?t=5480570	help I’m really worried that I’m not going to fit my work exprience into looking after my son also
P09	Exercises	websites	wwebsites	https://www.thestudentroom.co.uk/showthread.php?t=4690262	Have you seen this method before? Jim Clark explains it very well on his wwebsite.	https://www.thestudentroom.co.uk/showthread.php?t=687115	There is a wwebsite caled furthermathnetwork (or google further maths)
P09	Exercises	exercises	exrcises	https://www.strongfirst.com/community/threads/shoulder-injury-impingement-syndrome.10374/	Hello guys, I am looking for and advice about my shoulder. Four months ago while doing TGU (20 kg) as I was getting up from the windmil my shoulder went backwards followed by horrible pain. First I thought it was dislocated but RTG proved it is ok. Three days after, the same thing happen while I was sleeping. All of the sudden my shoulder "jumped out of the socket". After ultrasound examination, …	https://patient.info/forums/discuss/new-simptom-need-help--297942	I carnt exrcises as i have had to ops on my spin and my sergan said i am not alowed to do any exrcises what so ever or it could parilize me permanatly thanks for the abvice hun though
P09	Exercises	memory	meemory	https://community.whattoexpect.com/forums/emotional-health/topic/please-help-im-not-sure-whats-wrong-with-me.html	I have been in a couple of abusive relationships myself ans you would of thought i had lguy he was only earned my lesson, but no i had to think i was stella with her groove back when i meet this guy he was only 30 years old and he had sexy eyes and was 6ft7inches I am a fool for a tall man. So we started dating and being so fast and needy i found out two months later i was pregnant and was in lov…	https://www.shiachat.com/forum/topic/14635-boost-memory/	My meemory also sucks too. :( so I asked someone to help me (namely un uncle) and thenhe told me to eat loads of fish and raisins.
